# Supplementary material for: DNA Methylation Markers and Early Recurrence in Stage I Lung Cancer
Source: Atypon-hosted journal article supplement (doi:10.1056/nejmoa0706550), 2008-03-12
Supplement: nejm_brock_1118sa1.pdf [file nejm_brock_1118sa1.pdf]

## Supplementary Appendix

This appendix has been provided by the authors to give readers additional information about their work.

Supplement to: Brock MV, Hooker CM, Ota-Machida E, et al. DNA methylation markers and early recurrence in stage I lung cancer. *N Engl J Med* 2008;358:1118-28.

1   2   3   4   5   6   7   8   9   10   11   12

\* U M U M U M U M U M U M U M U M U M U M U M U M

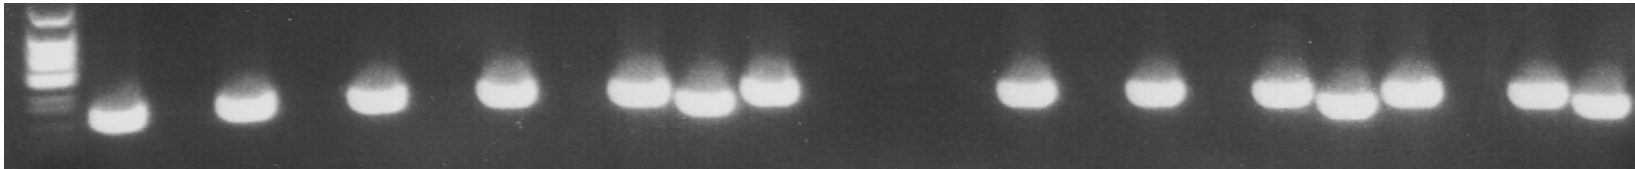

13   14   15   16   17   18   19   20   21   22   23   24

\* U M U M U M U M U M U M U M U M U M U M U M U M

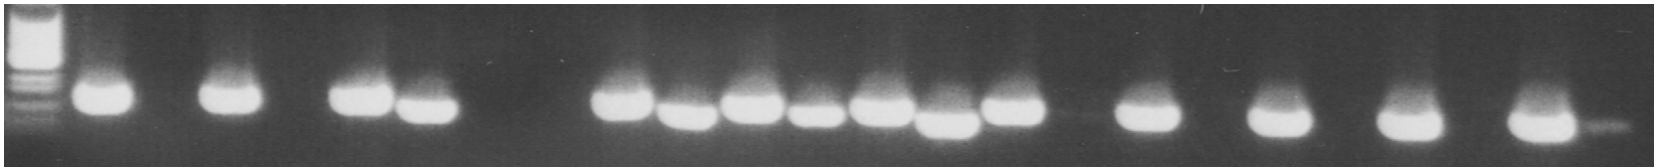

25   26   27   28   29   30   31   32   33   34   35   36

\* U M U M U M U M U M U M U M U M U M U M U M U M

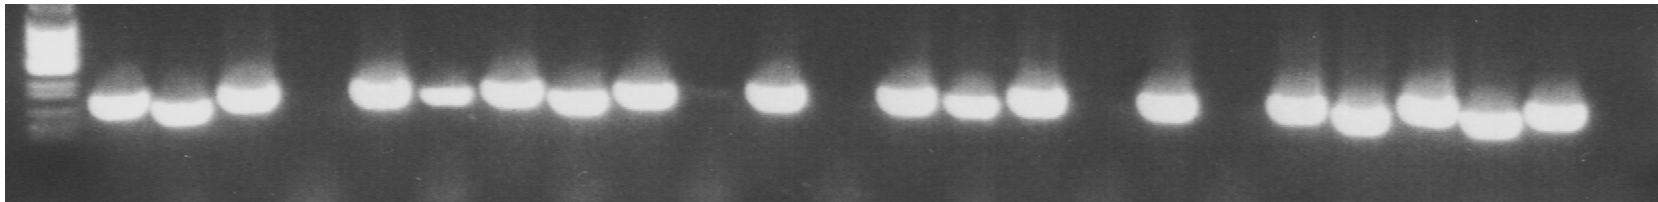

**Supplementary Figure 1:**

Methylation Specific PCR for the *H-cadherin* gene in 36 samples of tumors and lymph nodes, numbered at top of each panel. \* represents the molecular weight marker. For each sample, the presence of a visible PCR product in Lanes U indicates the presence of an unmethylated promoter region amplified and serves as a control for sample preparation; the presence of product in Lanes M indicates a methylated gene promoter and was scored as positive for methylation. Samples 7 and 16 did not amplify for this gene. Samples 1, 2, 3, 4, 8, 9, 11, 13, 14, 20, 21, 22, 23, 26, 30, 32, 33, 36 are scored as unmethylated. Samples 5, 10, 12, 15, 17, 18, 19, 25, 27, 28, 31, 34, and 35 are methylated and samples 24 and 29 had very minimal M amplification that was scored as negative.

Supplemental Table 1: METHYLATED SPECIFIC PCR CONDITIONS USED

FLANK PCR for APC, MGMT, ASC, P16, DAPK, H-CADHERIN, RASSF1A:  
Using 1:500 diluted Flank PCR product as the PCR templates:

95°C 5 Min 1 cycle  
95°C 30 Sec  
55°C 30 Sec  
72°C 40 Sec 36 cycles  
72°C 5 Min 1 cycle

INSIDE PCR for APC, MGMT, DAPK, RASSF1A:

95°C 5Min 1 cycle  
95°C 30 Sec  
60°C 30 Sec  
72°C 30 Sec 25 cycles  
72°C 5Min 1 cycle

INSIDE for P16:

95°C 5Min 1 cycle  
95°C 30 Sec  
64°C 30 Sec  
72°C 30 Sec 20 cycles  
72°C 5 Min 1 cycle

INSIDE for ASC:

95°C 5Min 1 cycle  
95°C 30 Sec  
66°C 30 Sec  
72°C 30 Sec 20 cycles  
72°C 5 Min 1 cycle

INSIDE for H-CADHERIN:

95°C 5Min 1 cycle  
95°C 30 Sec  
64°C 30 Sec  
72°C 30 Sec 30 cycles  
72°C 5 Min 1 cycle

**Supplemental Table 2. Crude and Adjusted Odds Ratios (ORs) and 95% Confidence Limits (95% CLs) for Risk of Recurrence for Selected Demographic Characteristics.**

| Characteristic                                                                                                                                                                           | Crude OR | 95% CL      | p value | Adjusted OR* | 95% CL      | p value |
|------------------------------------------------------------------------------------------------------------------------------------------------------------------------------------------|----------|-------------|---------|--------------|-------------|---------|
| Stage                                                                                                                                                                                    |          |             |         |              |             |         |
| 1A                                                                                                                                                                                       | 1.00     | ---         |         | 1.00         | ---         |         |
| 1B                                                                                                                                                                                       | 1.76     | 0.90 - 3.43 | 0.098   | 1.71         | 0.86 - 3.41 | 0.127   |
| Age, continuous                                                                                                                                                                          | 0.98     | 0.94 - 1.01 | 0.228   | 0.97         | 0.94 - 1.01 | 0.212   |
| Sex                                                                                                                                                                                      |          |             |         |              |             |         |
| Female                                                                                                                                                                                   | 1.00     | ---         |         | 1.00         | ---         |         |
| Male                                                                                                                                                                                     | 1.02     | 0.53 - 1.97 | 0.952   | 0.98         | 0.49 - 1.96 | 0.960   |
| Race                                                                                                                                                                                     |          |             |         |              |             |         |
| Caucasian                                                                                                                                                                                | 1.00     | ---         |         | 1.00         | ---         |         |
| African American                                                                                                                                                                         | 0.89     | 0.36 - 2.19 | 0.804   | 0.84         | 0.33 - 2.12 | 0.712   |
| Histology                                                                                                                                                                                |          |             |         |              |             |         |
| Adenocarcinoma                                                                                                                                                                           | 1.00     | ---         |         | 1.00         | ---         |         |
| Squamous Cell                                                                                                                                                                            | 0.79     | 0.37 - 1.68 | 0.417   | 0.81         | 0.37 - 1.79 | 0.610   |
| Other**                                                                                                                                                                                  | 1.07     | 0.36 - 3.18 | 0.952   | 0.89         | 0.28 - 2.76 | 0.835   |
| Smoking status                                                                                                                                                                           |          |             |         |              |             |         |
| Never                                                                                                                                                                                    | 1.00     | ---         |         | 1.00         | ---         |         |
| Ever                                                                                                                                                                                     | 0.63     | 0.24 - 1.66 | 0.351   | 0.72         | 0.26 - 1.99 | 0.529   |
| * Multivariable logistic regression model adjusted for stage (1A/1B), age (continuous), sex, race (C/AA), histology (adenocarcinoma, squamous cell, other), smoking status (ever/never). |          |             |         |              |             |         |
| ** Other histology- large cell (16), basoloid (1), mucoepidermoid (1).                                                                                                                   |          |             |         |              |             |         |

**Supplemental Table 3. Univariate Odds Ratios (OR) and 95% Confidence Limits (95% CLs) for Estimation of Risk of Recurrence by Methylation Status for Selected Gene Markers.**

|                           | Gene Marker                | Validation (n=20) |                    |         |
|---------------------------|----------------------------|-------------------|--------------------|---------|
|                           |                            | OR*               | 95% CL*            | p value |
| <b>Single Genes</b>       | Unmethylated               | 1.00              | referent           |         |
|                           | APC                        |                   |                    |         |
|                           | Tumor**                    | Undefined         | Undefined          |         |
|                           | N1                         | 0.53              | (0.08 – 3.31)      | 0.500   |
|                           | N2                         | 0.35              | (0.03 – 4.65)      | 0.426   |
|                           | Tumor and N2               | 0.70              | (0.04 – 13.18)     | 0.812   |
|                           | RASSF1A                    |                   |                    |         |
|                           | Tumor                      | 1.75              | (0.27 – 11.15)     | 0.554   |
|                           | N1                         | 1.50              | (0.19 – 11.93)     | 0.702   |
|                           | N2                         | 3.00              | (0.25 – 35.33)     | 0.383   |
|                           | Tumor and N2               | 1.56              | (0.12 – 20.85)     | 0.739   |
|                           | P16                        |                   |                    |         |
|                           | Tumor                      | 3.60              | (0.49 – 26.40)     | 0.208   |
|                           | N1                         | 8.17              | (1.03 – 64.94)     | 0.047   |
|                           | N2                         | 6.13              | (0.83 – 45.02)     | 0.075   |
|                           | Tumor and N2 <sup>†</sup>  | Infinity          | (0.811 – infinity) | 0.079   |
|                           | HCAD                       |                   |                    |         |
|                           | Tumor                      | 2.67              | (0.39 – 18.17)     | 0.316   |
|                           | N1                         | 8.00              | (1.00 – 63.96)     | 0.050   |
|                           | N2                         | 5.33              | (0.78 – 36.33)     | 0.087   |
| Tumor and N2              | 8.40                       | (0.76 – 93.43)    | 0.083              |         |
| <b>Gene Combinations</b>  | APC & RASSF1A              |                   |                    |         |
|                           | Tumor                      | 1.75              | (0.27 – 11.15)     | 0.554   |
|                           | N1                         | 3.43              | (0.29 – 40.95)     | 0.330   |
|                           | N2 <sup>‡</sup>            | 0.00              | (0.00 – 31.91)     | 0.900   |
|                           | Tumor and N2 <sup>‡</sup>  | 0.00              | (0.00 – 28.36)     | 0.842   |
|                           | APC & P16                  |                   |                    |         |
|                           | Tumor                      | 3.60              | (0.49 – 26.40)     | 0.208   |
|                           | N1                         | 1.50              | (0.19 – 11.93)     | 0.702   |
|                           | N2                         | 0.80              | (0.04 – 14.89)     | 0.881   |
|                           | Tumor and N2 <sup>†</sup>  | Infinity          | (0.04 – infinity)  | 0.579   |
|                           | APC & HCAD                 |                   |                    |         |
|                           | Tumor                      | 2.67              | (0.39 – 18.17)     | 0.316   |
|                           | N1                         | 5.33              | (0.47 – 60.80)     | 0.178   |
|                           | N2                         | 0.80              | (0.04 – 14.89)     | 0.881   |
|                           | Tumor and N2 <sup>†</sup>  | Infinity          | (0.04 – infinity)  | 0.579   |
|                           | RASSF1A & P16              |                   |                    |         |
|                           | Tumor                      | 1.71              | (0.23 – 12.89)     | 0.601   |
|                           | N1 <sup>†</sup>            | Infinity          | (0.17 – infinity)  | 0.526   |
|                           | N2 <sup>†</sup>            | Infinity          | (0.15 – infinity)  | 0.579   |
|                           | Tumor and N2 <sup>††</sup> | Undefined         | Undefined          |         |
|                           | RASSF1A & HCAD             |                   |                    |         |
|                           | Tumor                      | 1.39              | (0.22 – 8.92)      | 0.729   |
|                           | N1                         | 3.43              | (0.29 – 40.95)     | 0.330   |
|                           | N2 <sup>†</sup>            | Infinity          | (0.15 – infinity)  | 0.579   |
|                           | Tumor and N2 <sup>†</sup>  | Infinity          | (0.04 – infinity)  | 0.579   |
|                           | P16 & HCAD                 |                   |                    |         |
|                           | Tumor                      | 2.50              | (0.34 – 18.33)     | 0.367   |
|                           | N1                         | 18.67             | (1.56 – 222.93)    | 0.021   |
| N2                        | 6.13                       | (0.83 – 45.02)    | 0.075              |         |
| Tumor and N2 <sup>†</sup> | Infinity                   | (0.53 – infinity) | 0.170              |         |

\* Univariate odds ratios and 95% confidence limits

\*\* All subjects positive for methylation.

† No methylation in controls.

‡ No methylation in cases.
